# Supplementary material
Source: publisher figshare collection journal article supplement (https://plos.figshare.com/articles/dataset/_/1581333)

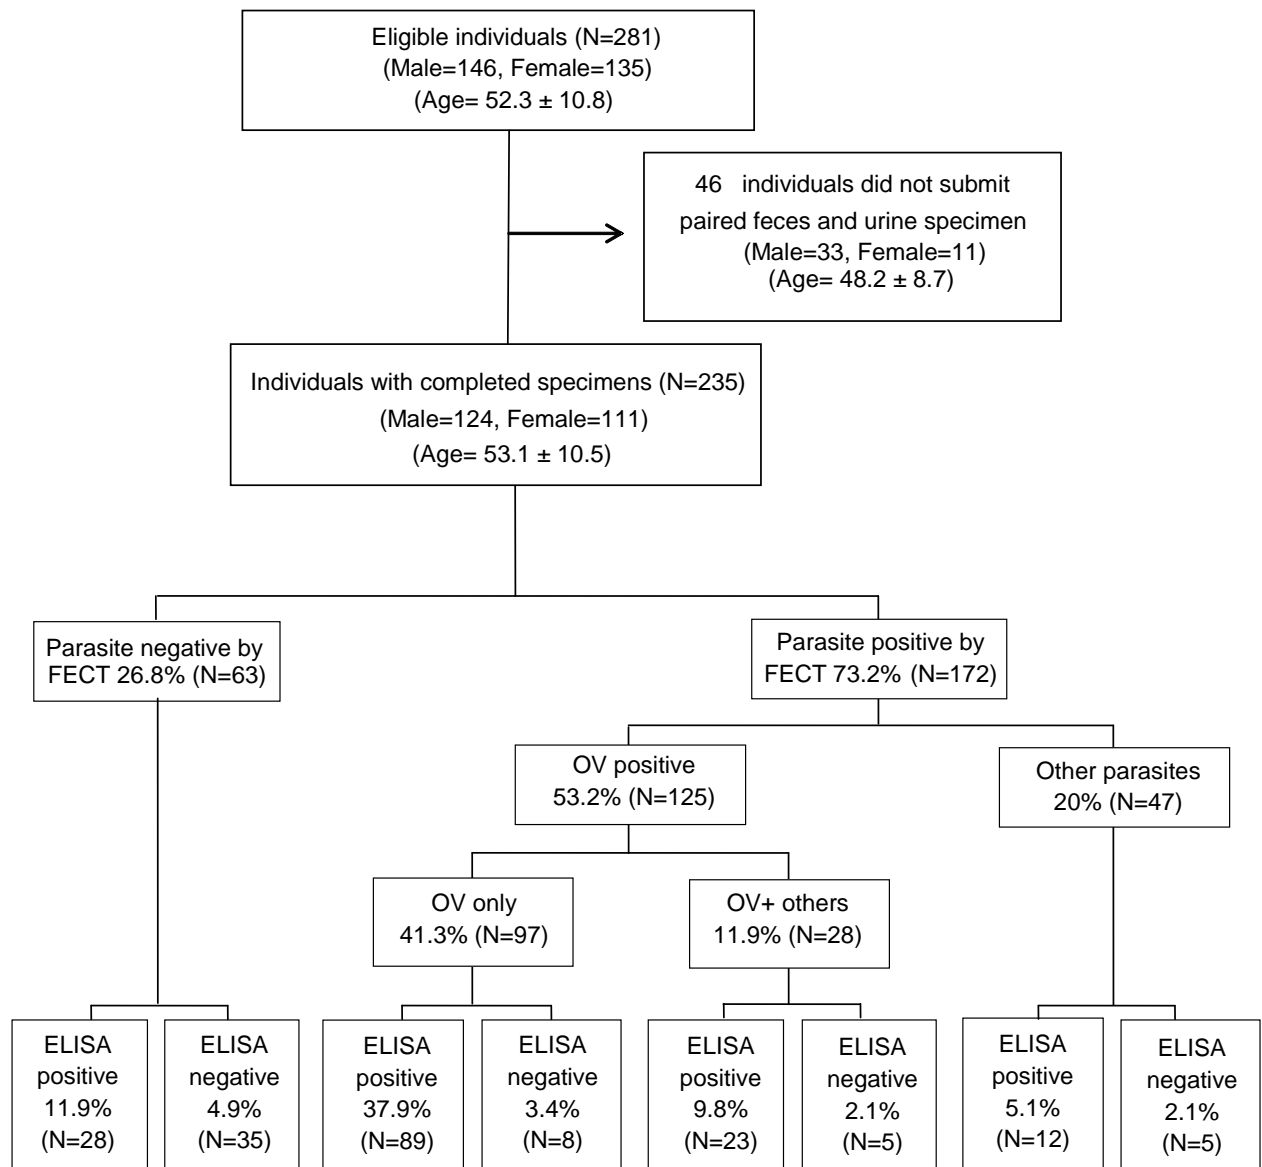

Supplement: Supplementary file 1 [file 1 › S1_Fig.pdf]

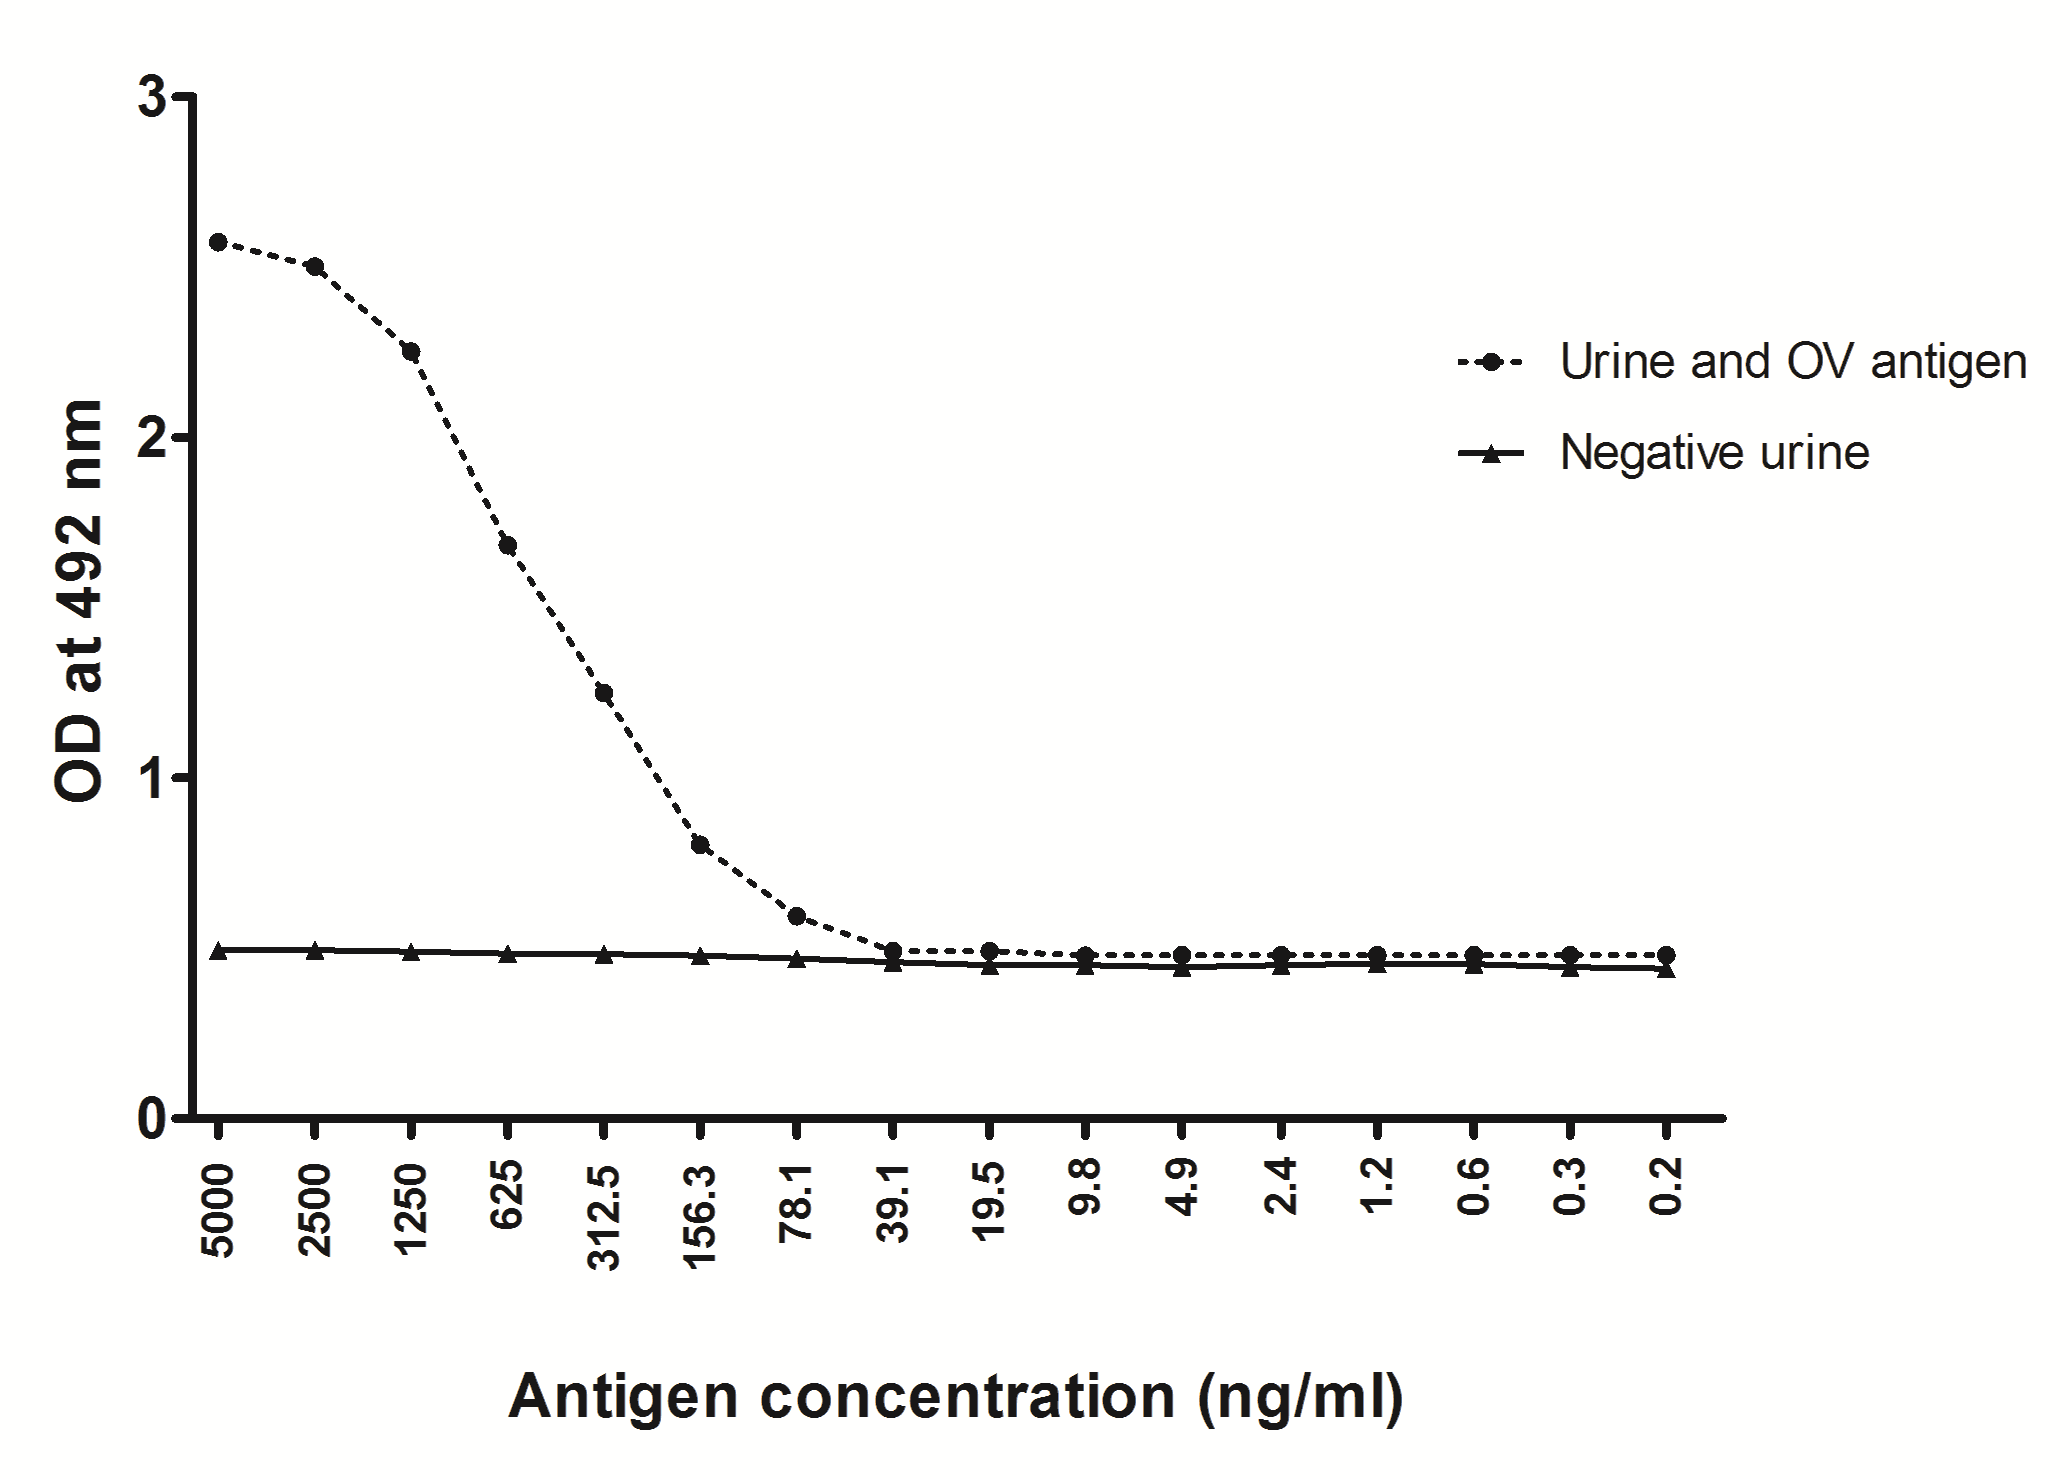

Supplement: Supplementary file 1 [file 1 › S2_Fig.tif]
